# Supplementary material
Source: PubMed Central journal article supplement (PMC3234818)

## SUPPORTING INFORMATION

### STRUCTURAL BASIS FOR THE 14-3-3 PROTEIN-DEPENDENT INHIBITION OF G-PROTEIN SIGNALING 3 (RGS3) FUNCTION

**Lenka Rezabkova<sup>1,3</sup>, Petr Man<sup>2,4</sup>, Petr Novak<sup>2,4</sup>, Petr Herman<sup>5</sup>, Jaroslav Vecer<sup>5</sup>,  
Veronika Obsilova<sup>3</sup>, and Tomas Obsil<sup>1,3</sup>**

From Department of <sup>1</sup>Physical and Macromolecular Chemistry and <sup>2</sup>Biochemistry Faculty of Science, Charles University in Prague, 12843 Prague, Czech Republic, the Institutes of <sup>3</sup>Physiology and <sup>4</sup>Microbiology, Academy of Sciences of the Czech Republic, 14220 Prague, Czech Republic, and the <sup>5</sup>Faculty of Mathematics and Physics, Institute of Physics, Charles University in Prague, 12116 Prague, Czech Republic

Address correspondence to: Tomas Obsil, Faculty of Science, Charles University, Hlavova 8, 12843 Prague, Czech Republic. Tel.: 420-221951303; Fax: 420-224919752;

E-mail: [obsil@natur.cuni.cz](mailto:obsil@natur.cuni.cz)

## FIGURE LEGENDS

Fig. S1. Theoretical prediction of RGS3 (human isoform 1) disorder. The disorder was predicted using the web-based program GlobPlot (<http://globplot.embl.de/>). The black and the gray bars denote the N-terminal part (residues 255-383) and the C-terminal RGS domain (residues 384-513), respectively. The position of the phosphorylation site (S264) is labeled as (P).

Fig. S2. Peptide mapping of 14-3-3 $\zeta$  after the digestion on the pepsin column. The blue bars represent all identified peptides (sequence coverage 100%), red bars are peptides for which the H/D exchange kinetics was followed (sequence coverage 98%). The secondary structure elements (helices H1-H9) are shown above the sequence.

Fig. S3. Peptide mapping of RGS3 after digestion on the pepsin column. The blue bars represent all identified peptides (sequence coverage 100%), the red bars represent peptides for which the H/D exchange kinetics was followed (sequence coverage 99%). The secondary structure elements are shown above the sequence.

Fig. S4. Circular dichroism spectroscopy. (A) The comparison of the far-UV CD spectra of pRGS3 WT (red line) and AEDANS-labeled pRGS3(C456) (black line). (B) The comparison of the sum of the individual far-UV CD spectra of pRGS3 and 14-3-3 $\zeta$  (red line) with the far-UV CD spectrum of the 14-3-3 $\zeta$ :pRGS3 complex (black line). The mean residue ellipticity (MRE) is plotted as a function of the wavelength.

Figure S1

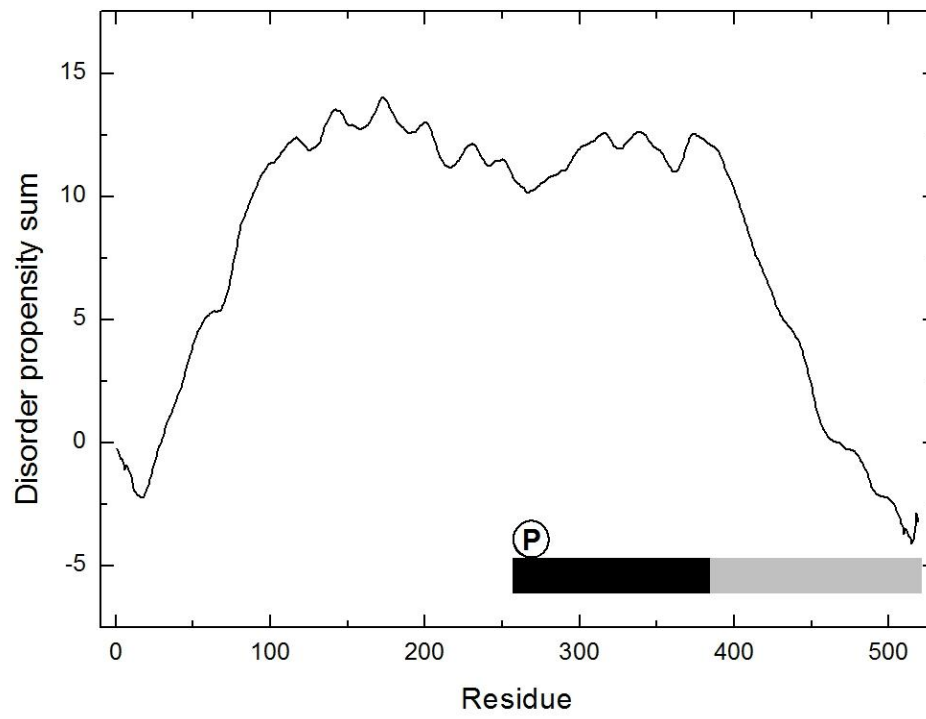

Figure S2

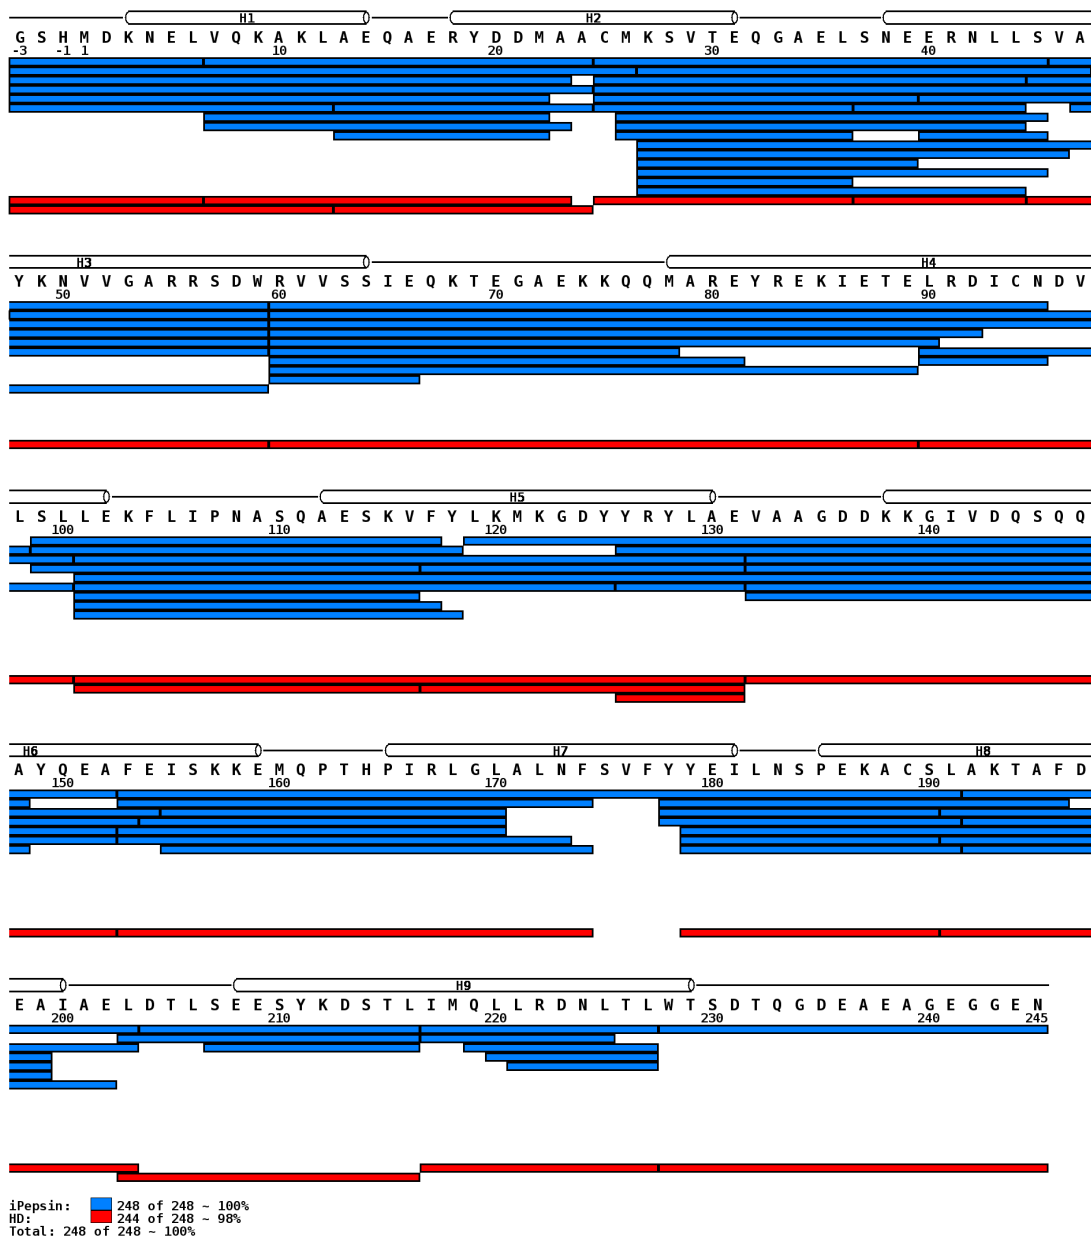

Figure S3

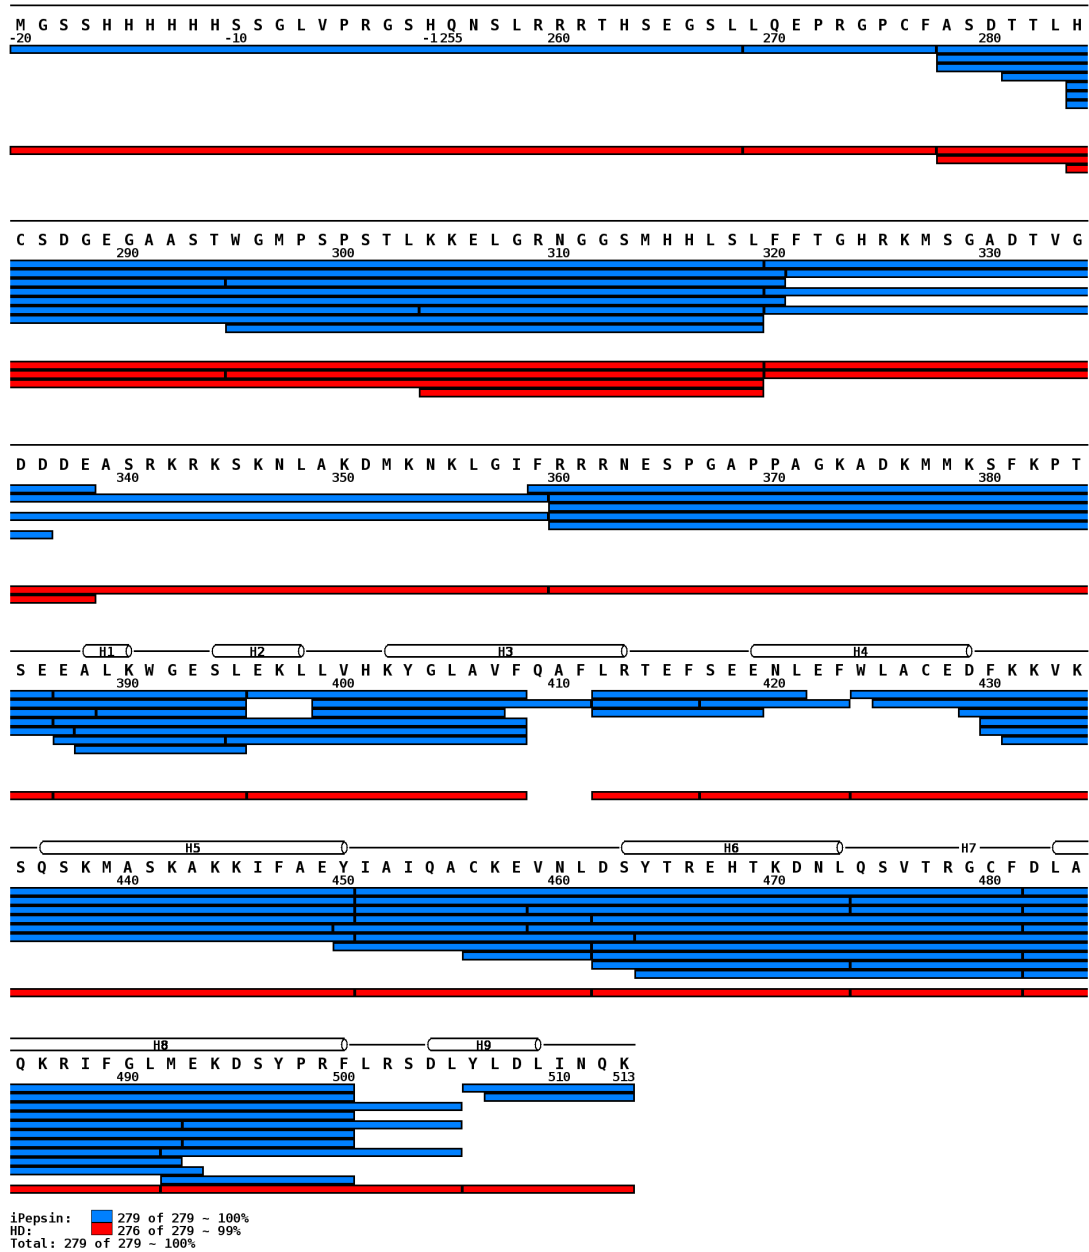

Figure S4

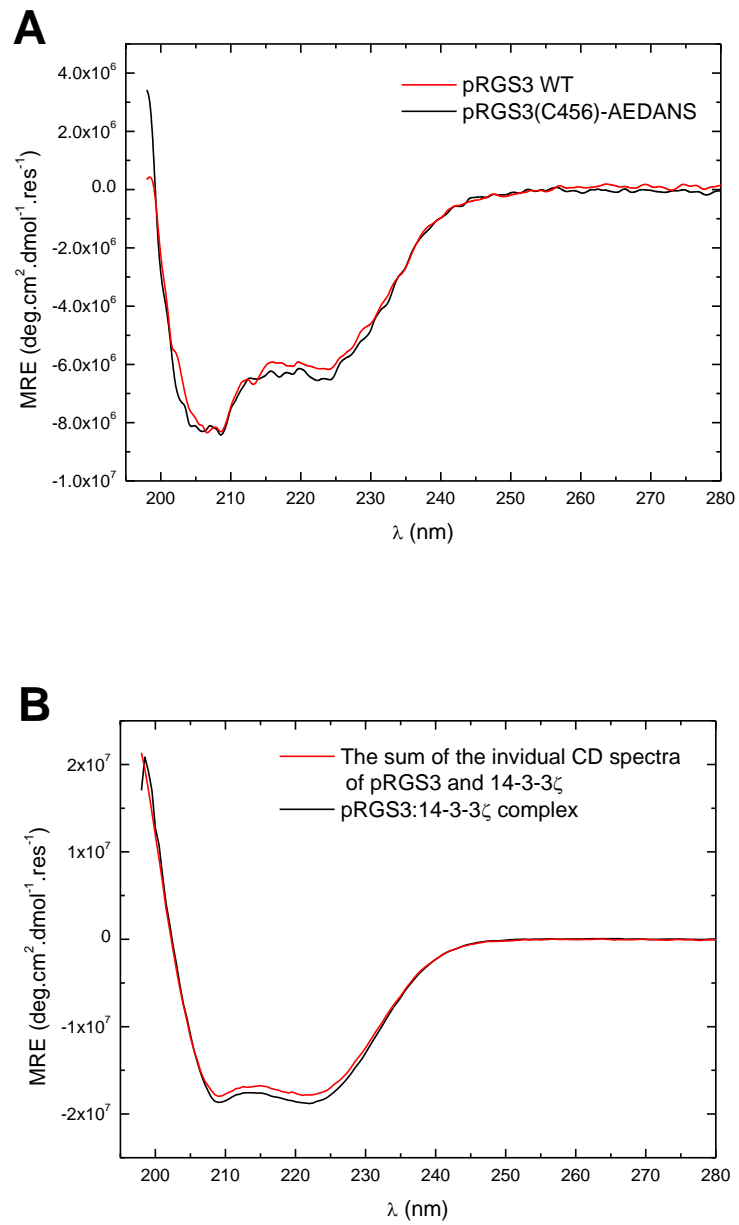

Supplement: supp_M111.273573_jbc.M111.273573-1.pdf [file supp_M111.273573_jbc.M111.273573-1.pdf]
